# Supplementary material for: Micropatterned Poly(3,4-ethylenedioxythiophene) Thin Films with Improved Color-Switching Rates and Coloration Efficiency
Source: MDPI journal article supplement (doi:10.3390/polym14142951), 2022-07-21
Supplement: s1 [file s1]

# Micropatterned Poly(3,4-ethylenedioxythiophene) Thin films with Improved Color-switching Rates and Coloration Efficiency

Cheng-Lan Lin<sup>a,b,\*</sup>, Tzung-Lin Cheng<sup>a</sup>, Nian-Jheng Wu<sup>c</sup>

<sup>a</sup> Department of Chemical and Materials Engineering, Tamkang University, New Taipei City, Taiwan

<sup>b</sup> Water Treatment Science and Technology Research Center, Tamkang University, New Taipei City, Taiwan

<sup>c</sup> Institut des Sciences Moléculaires d'Orsay, Université Paris-Saclay, CNRS, Orsay, France

\*Corresponding author. Department of Chemical and Materials Engineering, Tamkang University, New Taipei City 25137, Taiwan. Tel.: + 886 2 26215656 ext. 2723; E-mail address: [cllin@mail.tku.edu.tw](mailto:cllin@mail.tku.edu.tw); [cllintw@gmail.com](mailto:cllintw@gmail.com).

## Supporting Information

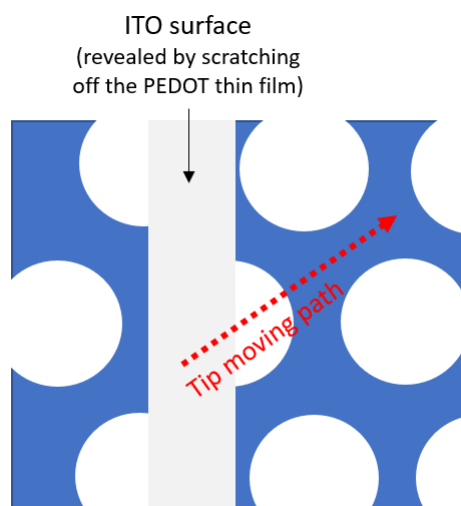

**Scheme S1** Illustration of the surfacorder tip moving path when measuring the thickness of a mPEDOT thin film.

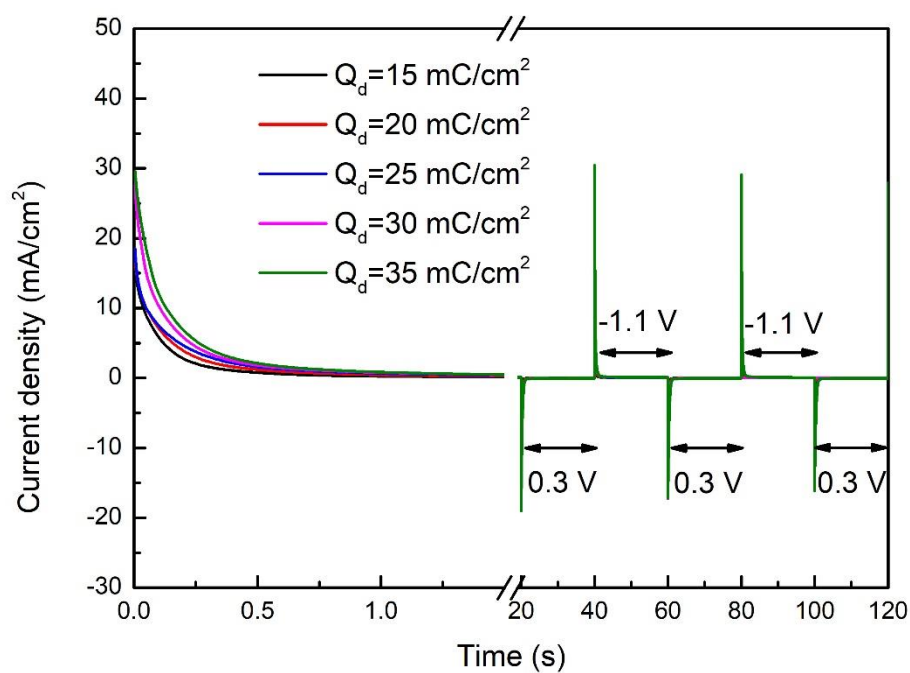

**Figure S1** *i-t* curves of the successive chronoamperometry experiments of the PEDOT thin films electrodeposited using different  $Q_d$ .

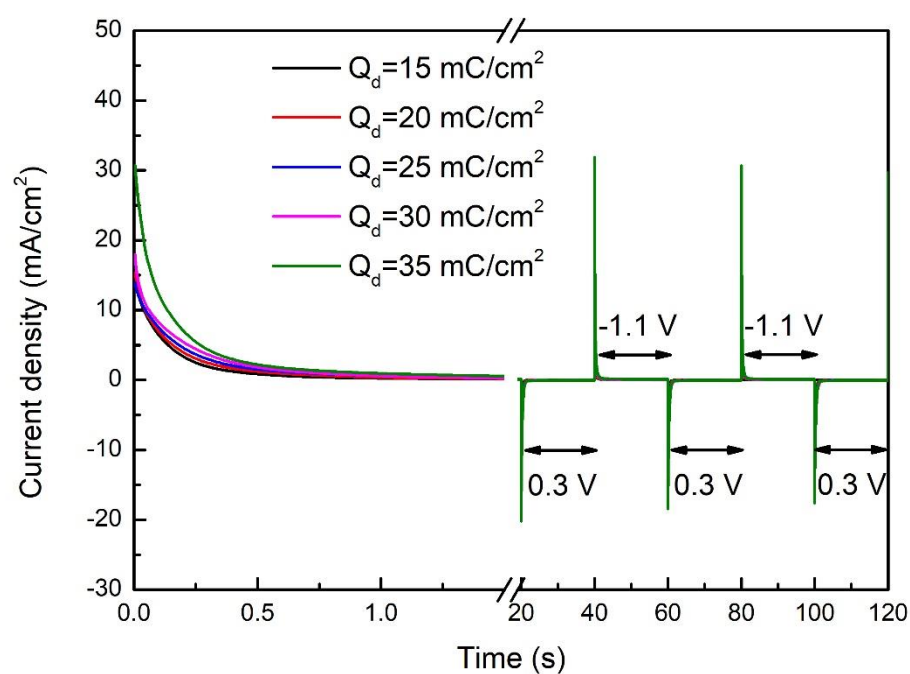

**Figure S2** *i-t* curves of the successive chronoamperometry experiments of the mPEDOT thin films electrodeposited using different  $Q_d$ .
